# Supplementary material for: Oligodendrocytes Prune Axons Containing α-Synuclein Aggregates In Vivo: Lewy Neurites as Precursors of Glial Cytoplasmic Inclusions in Multiple System Atrophy?
Source: MDPI journal article supplement (doi:10.3390/biom13020269), 2023-02-01
Supplement: s1 [file s1]

# Figure S1

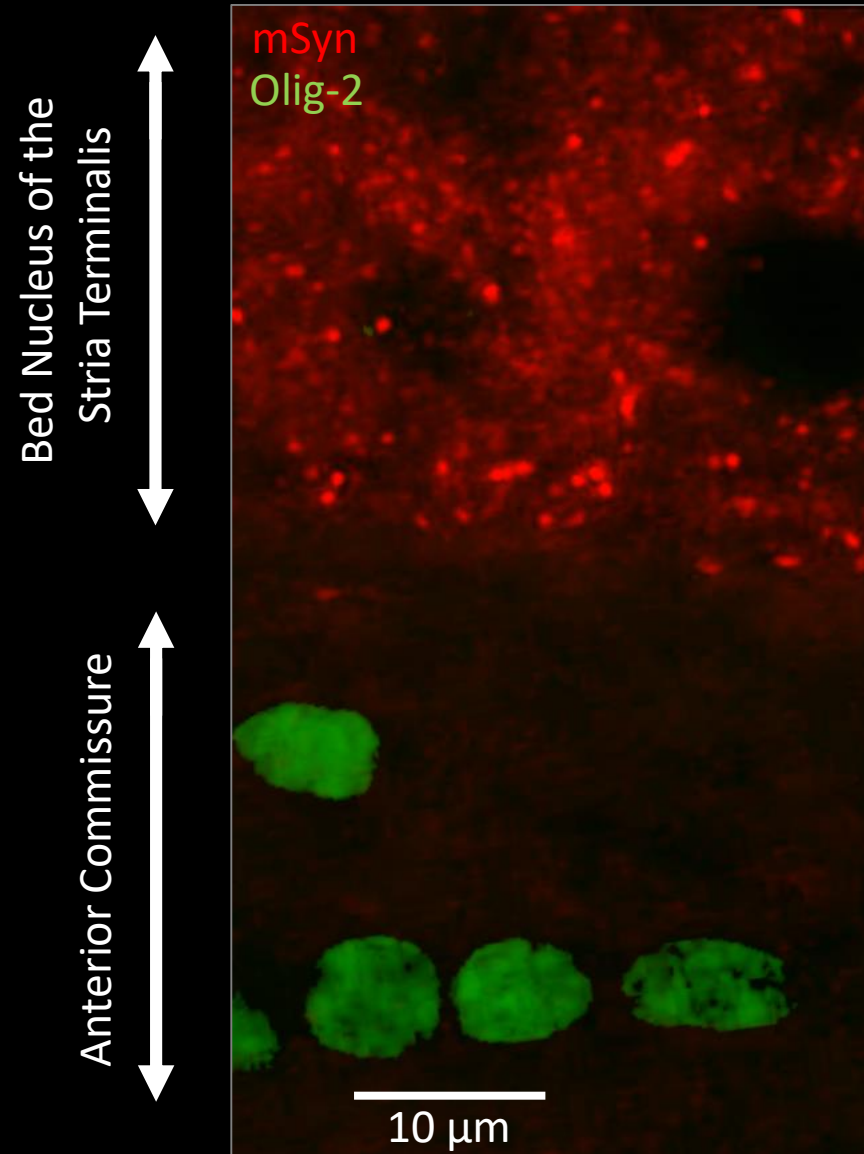

Fig. S1 Legend: Double immunofluorescence revealing interfascicular OLs (Olig-2, 211F1.1 antibody, green) and mouse  $\alpha$ -Syn (mSyn, D37A6 antibody, red) at the level of the transition zone between the anterior commissure (white matter) and the bed nucleus of the stria terminalis (grey matter) of a control mouse. Horizontal brain section. Note the synaptic distribution of  $\alpha$ -Syn in the grey matter (black voids surrounded by synapses correspond to neuronal somatas), and its absence in OLs and more generally, in the commissural compartment.

# Figure S2

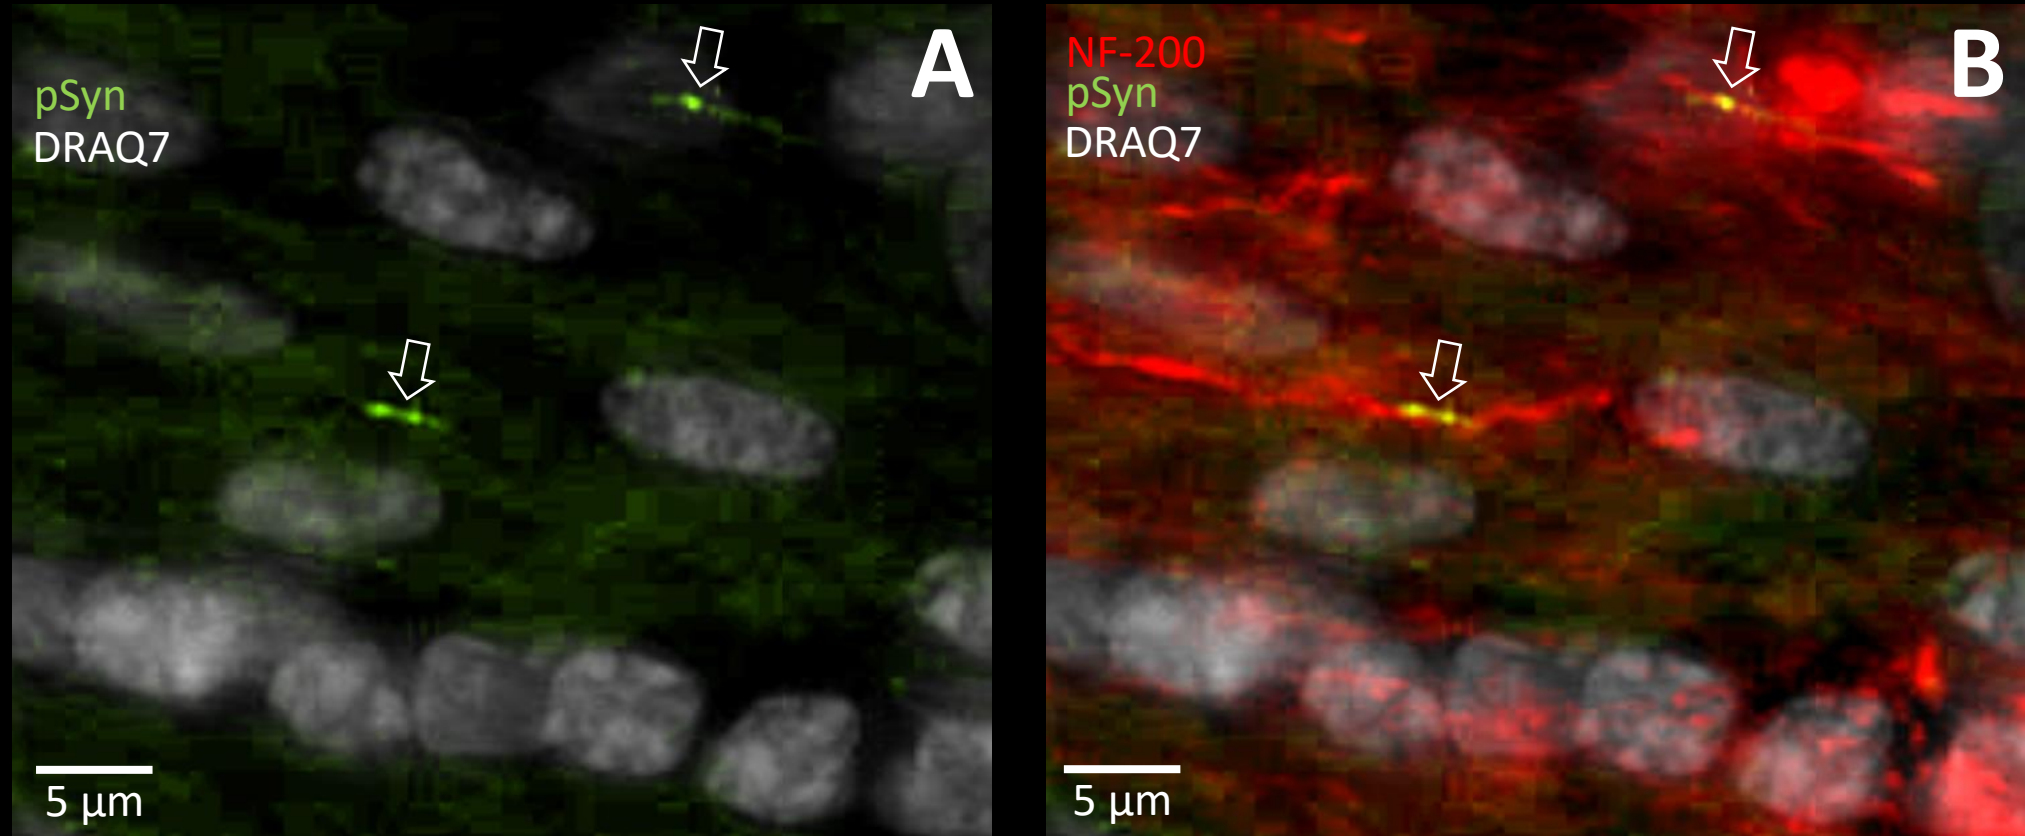

Fig. S2 Legend: Double immunofluorescence revealing Lewy neurites (pSyn, Green) and crossing axons (NF-200, red) at the level of the anterior commissure of a mouse 6 weeks after the intrastriatal injection of  $\alpha$ -Syn PFFs. Horizontal brain section. Nuclei are counterstained with DRAQ7 (white). In A, only pSyn is shown, note the 2 Lewy neurites (empty arrows). In B, both NF-200 and pSyn are shown, evidencing the axonal nature of the Lewy neurites.

# Figure S3

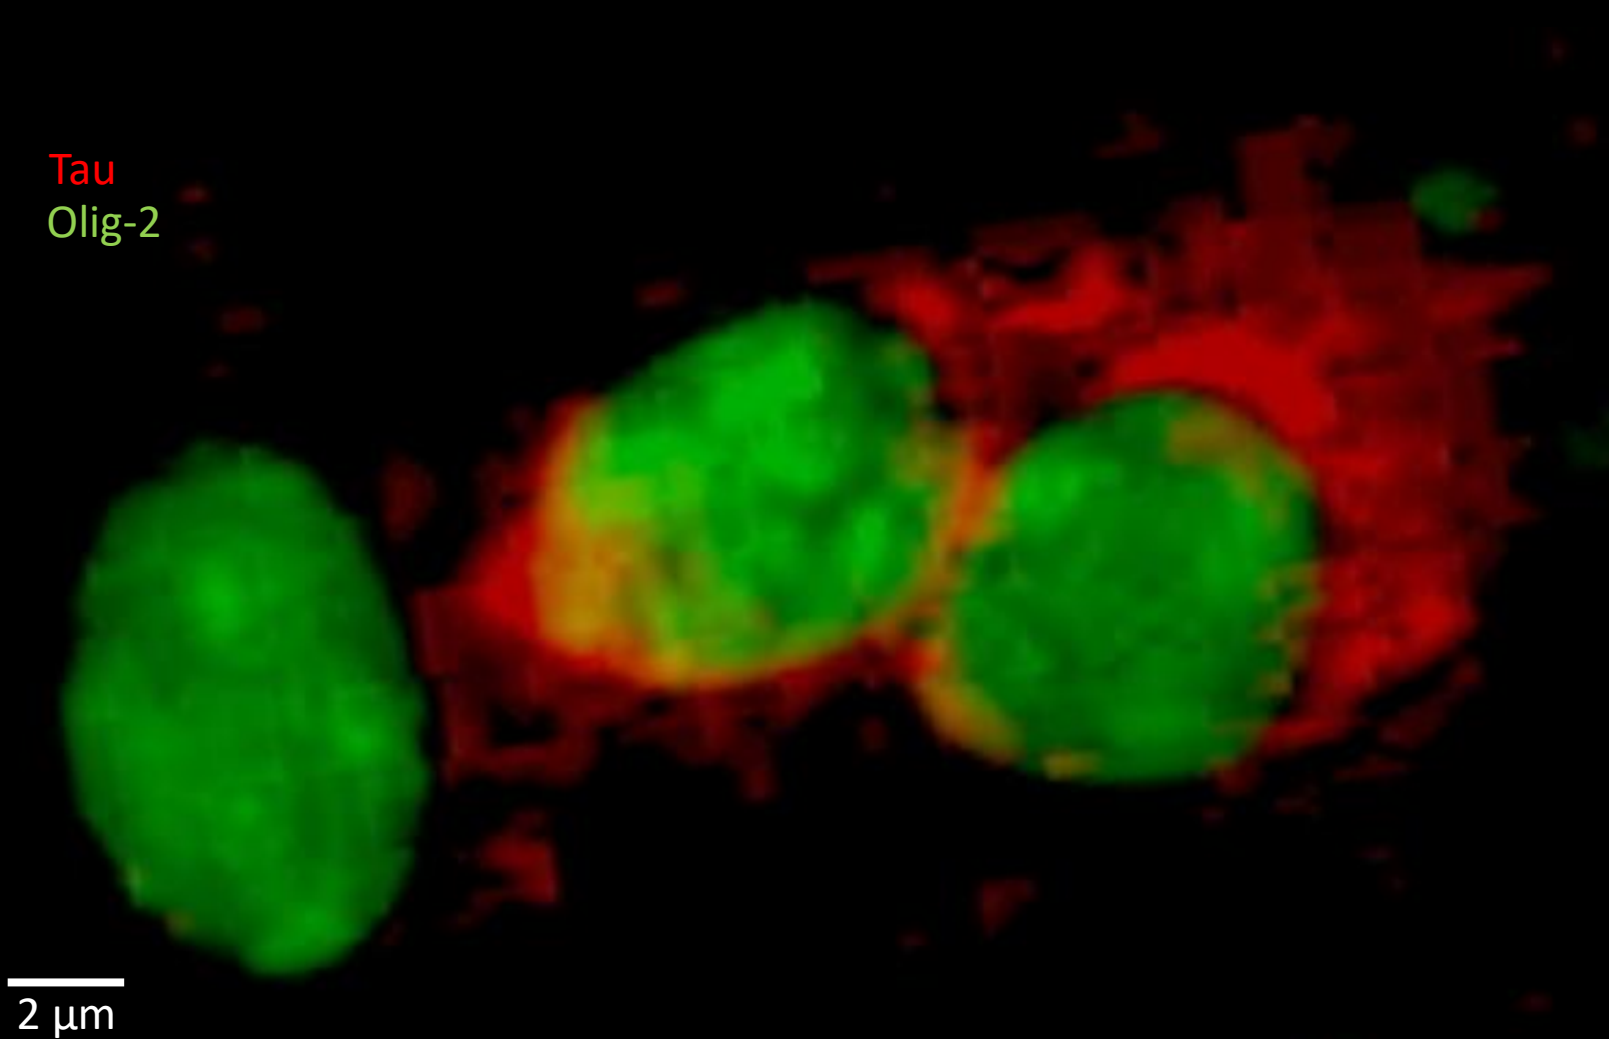

Fig. S3 Legend: Double immunofluorescence revealing the nuclei of 3 interfascicular OLs (Olig-2, Green) and of Tau (T47 antibody, red) in the anterior commissure of a control mouse. Horizontal brain section. In agreement with previous reports, Tau is most often present in the cytoplasm of OLs (2 out of 3 OLs in this image) reflecting the level of differentiation of the OLs.

# Figure S4

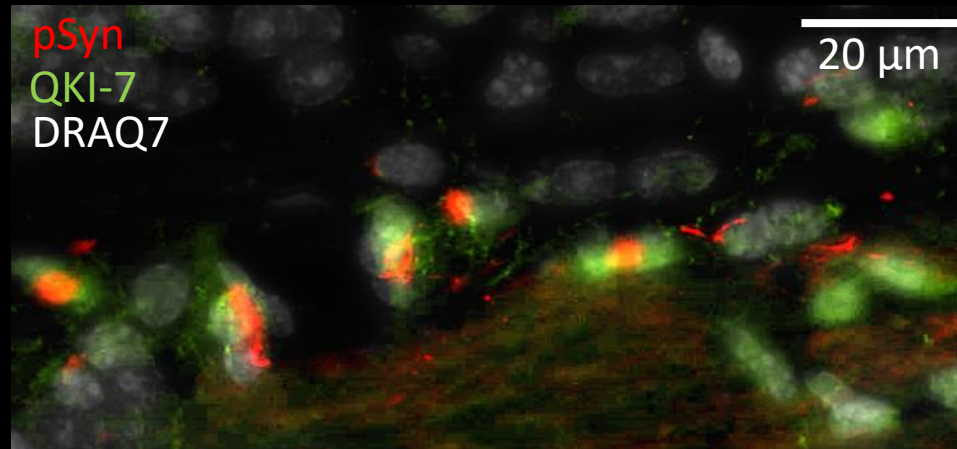

Fig. S4 Legend: Double immunofluorescence revealing pruned Lewy Neurites (pSyn, Red) and the cytoplasm of mature OLs (QKI-7, green) at the level of the anterior commissure of a mouse 6 months after the intrastriatal injection of  $\alpha$ -Syn PFFs. Horizontal brain section. Nuclei are counterstained with DRAQ7 (white).



# Figure S5

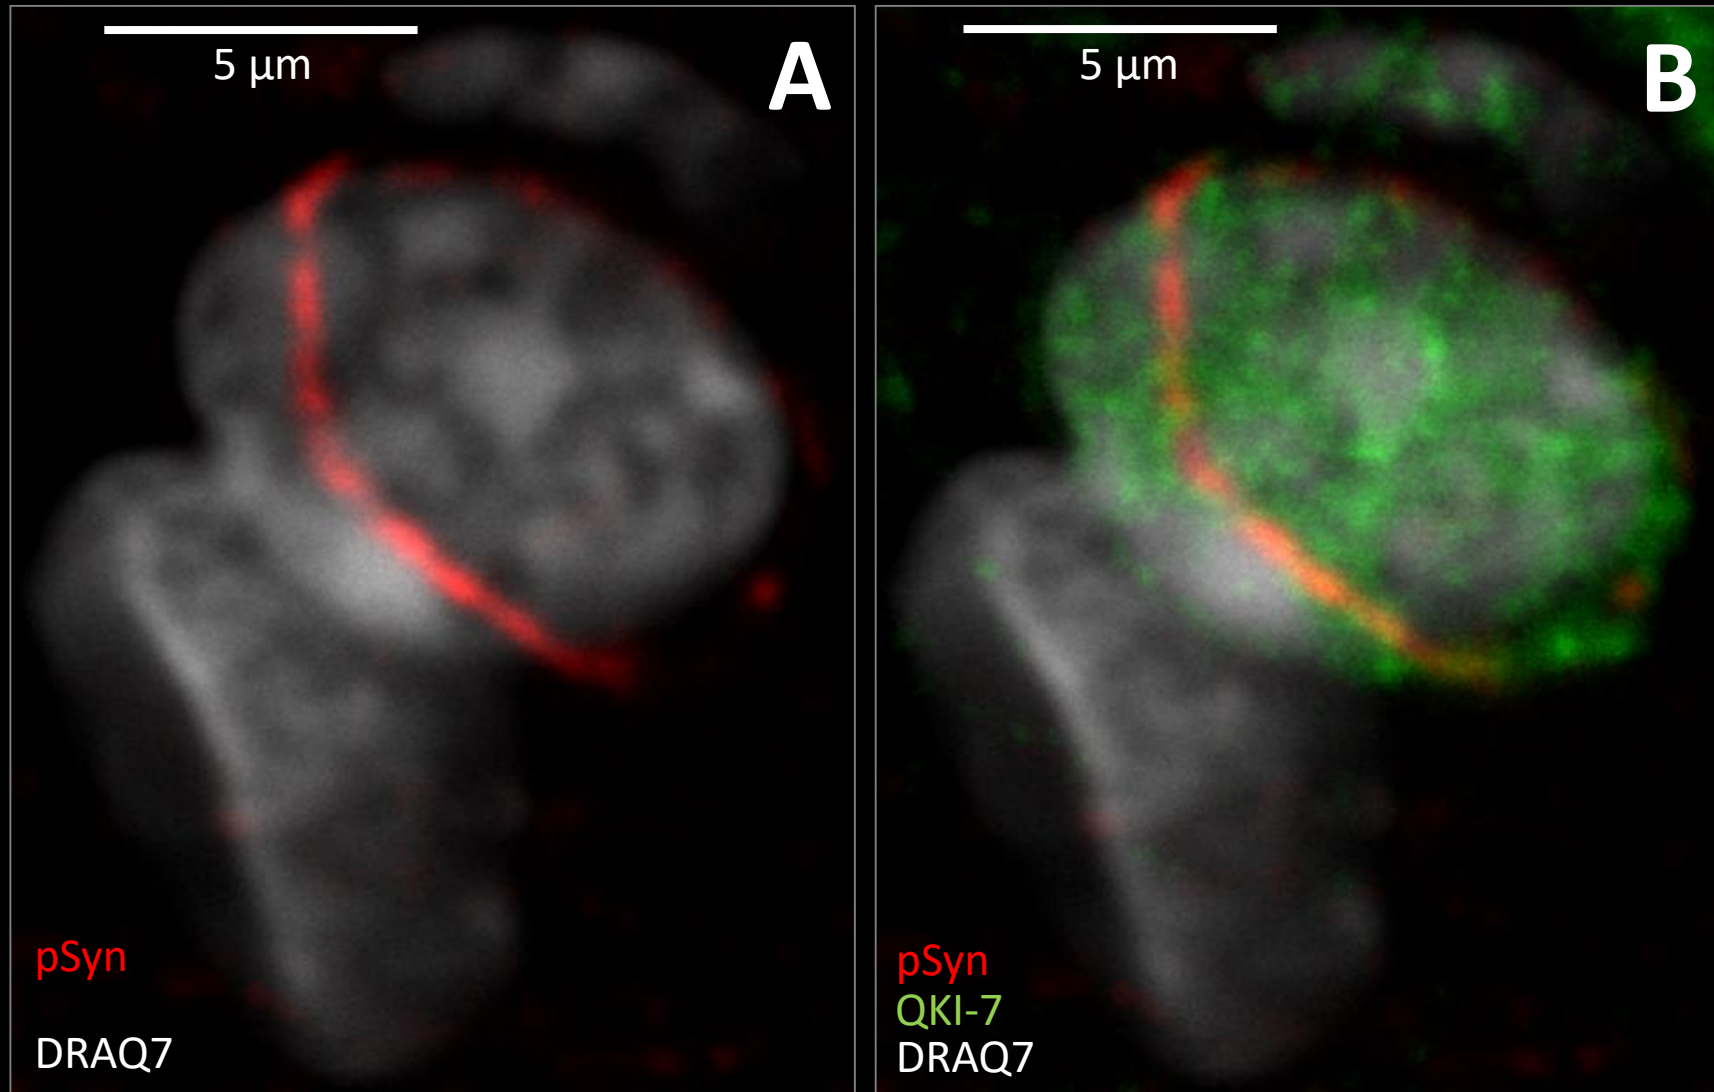

Fig. S5 Legend: Confocal imaging of a double immunofluorescence showing a mature OL (QKI-7, green) pruning a Lewy Neurite (pSyn, red) in the anterior commissure of a mouse 6 months after the intrastriatal injection of  $\alpha$ -Syn PFFs. Horizontal brain section. Nuclei stained with DRAQ7 (white). In A, only pSyn is shown while in B, both pSyn and the mature OL marker QKI-7 are shown.
